# Supplementary material for: Scale-Dependent Spatial Ecology of Paleotropical Leaf Litter Ants (Hymenoptera: Formicidae)
Source: MDPI journal article supplement (doi:10.3390/d15040494), 2023-03-27

## SUPPLEMENTARY MATERIALS

**Table S1.** Spatial autocorrelation in ant abundance occurs at scales  $> 1.5$  m in all plots.

| Plot     | Range | Sill | Nugget |
|----------|-------|------|--------|
| Core-1   | 1.89  | 1201 | 0      |
| Core-2   | 0.98  | 1389 | 0      |
| Core-3   | 1.34  | 1327 | 0      |
| Core-4   | 1.31  | 1256 | 0.001  |
| Core-5   | 0.79  | 1562 | 0      |
| Core-6   | 1.31  | 1324 | 0.02   |
| Buffer-1 | 1.45  | 1236 | 0      |
| Buffer-2 | 1.13  | 1235 | 0      |
| Buffer-3 | 1.90  | 1325 | 0.01   |
| Buffer-4 | 0.76  | 1756 | 0      |
| Buffer-5 | 1.41  | 1678 | 0.08   |
| Buffer-6 | 0.91  | 1237 | 0      |

**Figure S1.** Ant abundance (number of individuals) among all plots (16 m<sup>2</sup>). X = quadrat. Y = number of ants

present. Sites connected by a letter are not significantly different ( $\alpha = 0.05$ ). Bars represent standard error.

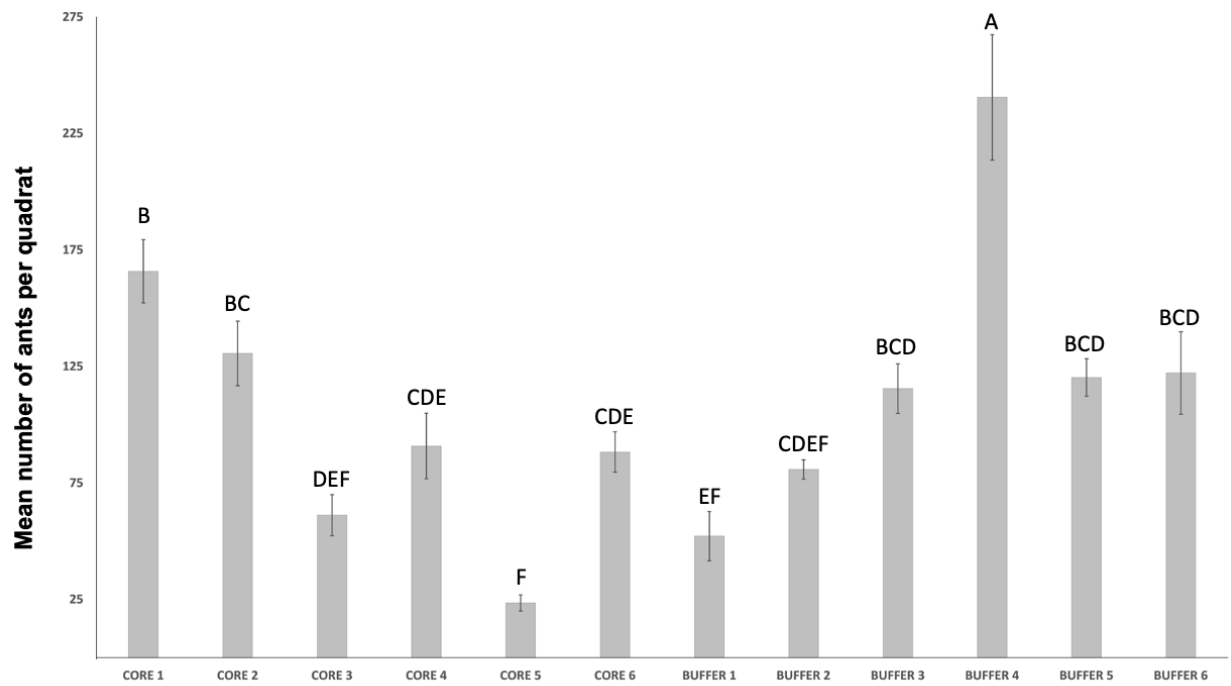

Supplement: s1 [file s1]
